# Supplementary material
Source: PubMed Central journal article supplement (PMC5584590)
Supplement: NIHMS893589-supplement-Supplement.pdf [file NIHMS893589-supplement-Supplement.pdf]

## Supporting Information

# Real-Time *In Vivo* Detection of H<sub>2</sub>O<sub>2</sub> using Hyperpolarized <sup>13</sup>C- Thiourea

Arif Wibowo<sup>1</sup>, Jae Mo Park<sup>2,3</sup>, Shie-Chau Liu<sup>3</sup>, Chaitan Khosla<sup>1,4,5</sup>, Daniel M. Spielman<sup>3</sup>

<sup>1</sup> Department of Biochemistry, Stanford University, <sup>2</sup> Advanced Imaging Research Center, University of Texas Southwestern Medical Center, <sup>3</sup> Department of Radiology, Stanford University, <sup>4</sup> Department of Chemistry, Stanford University, and <sup>5</sup> Stanford ChEM-H, Stanford University

### Contents:

1. Supplemental Figures 1-4
2. Experimental Methods

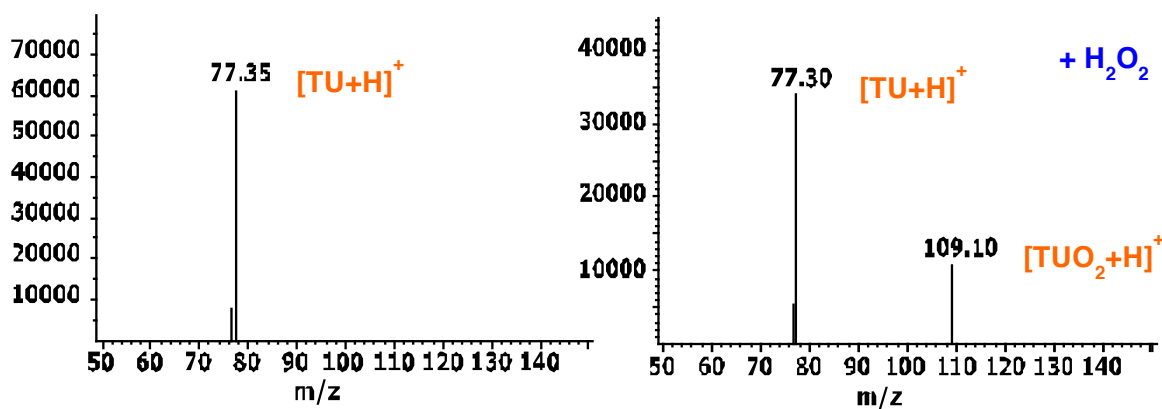

**Figure S1.** MS analysis of thiourea (TU) oxidation by H<sub>2</sub>O<sub>2</sub> as reported in positive ion mode. TUO<sub>2</sub> was detected after addition of H<sub>2</sub>O<sub>2</sub>

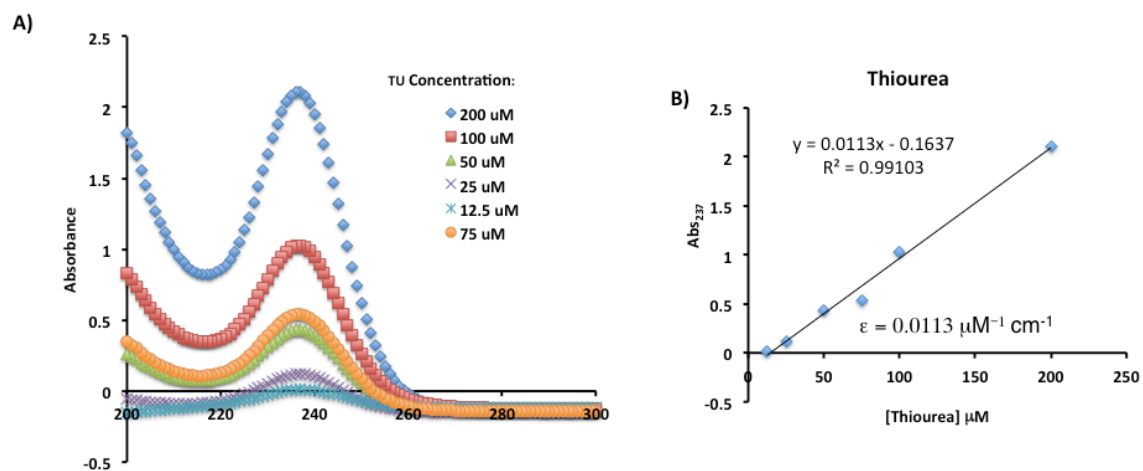

**Figure S2** A) UV/Vis spectroscopic analysis of different thiourea concentrations (200-300 nm). Thiourea has a specific absorbance at 237 nm. B) Extinction coefficient for thiourea is estimated at  $0.0113 \mu\text{M}^{-1} \text{cm}^{-1}$  (path length = 1 cm).

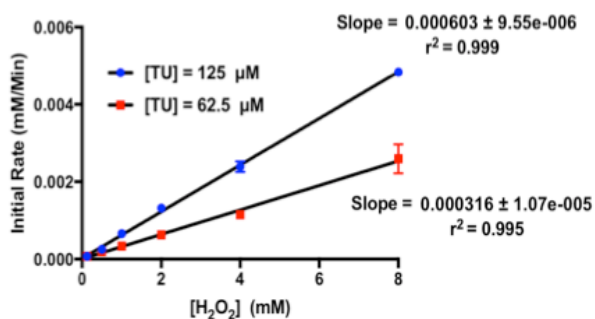

$$\text{Rate} = k_2 [\text{TU}]^x [\text{H}_2\text{O}_2]^y$$

Initial Rate is linearly proportional to  $[\text{H}_2\text{O}_2]$   
 $\Rightarrow y = 1$

Slope =  $k_2 [\text{TU}]^x$   
 $\Rightarrow$  slope is linearly proportional to  $[\text{TU}]$   
 $\Rightarrow x = 1$

$$k_2 = 0.082 \pm 0.002 \text{ M}^{-1} \text{ s}^{-1}$$

$$= 4.94 \pm 0.08 \text{ M}^{-1} \text{ min}^{-1}$$

**Figure S3.** Rate of thiourea oxidation by  $\text{H}_2\text{O}_2$ . Initial rate of oxidation was calculated from the first 500 s of reaction, and plotted against  $\text{H}_2\text{O}_2$  concentration. The second order rate constant was estimated from the slope of the graph; an average value ( $k_2$ ) was calculated from two different thiourea concentrations.

|                                               | Hyper Sense<br>(3.35 T, operating 1.2K) | SpinLab<br>(5 T, operating 0.8K) |
|-----------------------------------------------|-----------------------------------------|----------------------------------|
| $T_1$ (s)                                     | 30.91                                   | 57.50                            |
| Initial<br>% Polarization                     | 3.1                                     | 11.5                             |
| Scanner<br>% Polarization                     | 1.1                                     | 6.5                              |
| Time delay from<br>dissolution to scanner (s) | 32                                      | 33                               |

**Figure S4.** Spin-lattice relaxation time ( $T_1$ ) and polarization level of hyperpolarized  $^{13}\text{C}$ -TU as measured in 3T Scanner.

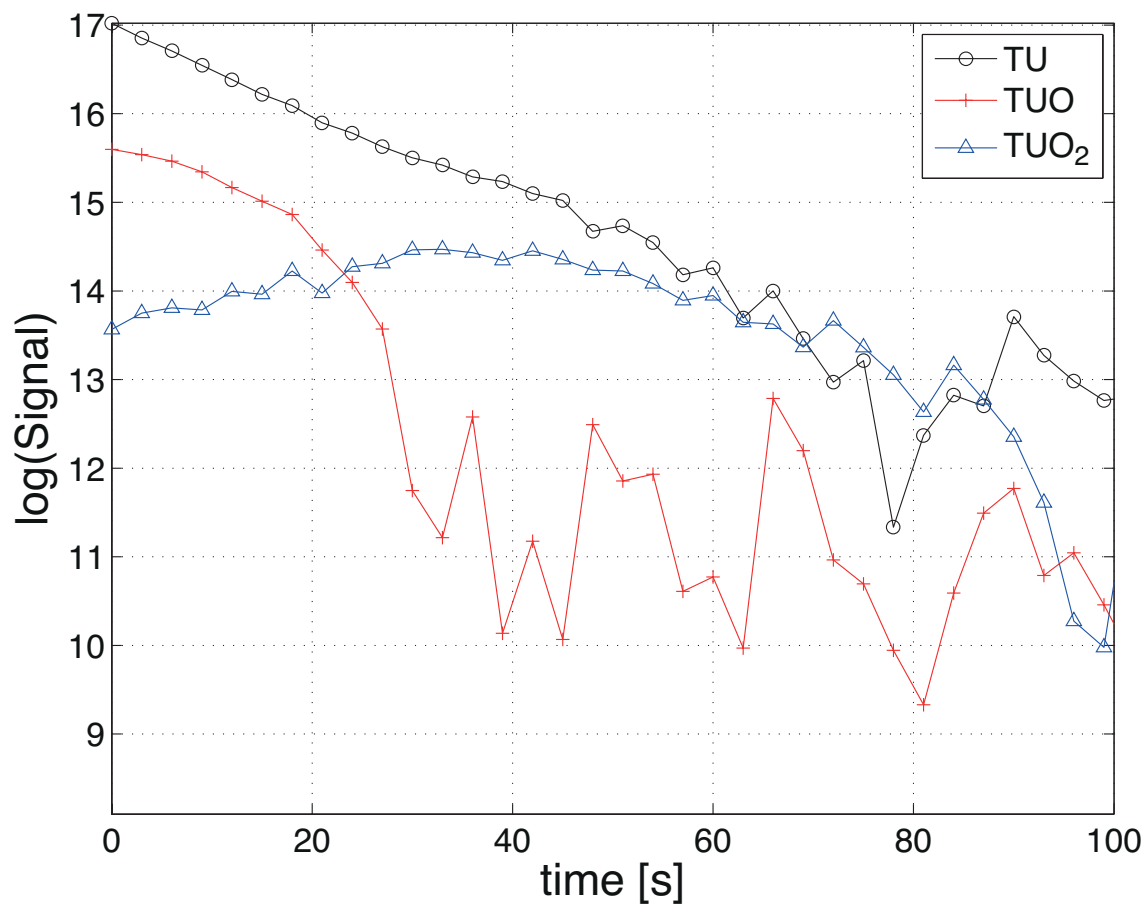

**Figure S5.** *In vitro* signal decays of hyperpolarized  $^{13}\text{C}$ -thiourea and oxidation products (TUO and  $\text{TUO}_2$ ) at 3T when mixed with  $\text{H}_2\text{O}_2$

## General Methods

All commercially obtained reagents were used as received unless otherwise noted. OX063 radicals were obtained from Oxford Instruments (UK), and AH11151 radicals were obtained from GE Healthcare (USA).  $^{13}\text{C}$ -thiourea was from Cambridge Isotope (Andover, MA). NaONOO was from Calbiochem (Billerica, MA). TBHP was from Alfa Aesar (Tewksbury, MA). All other reagents were from Sigma-Aldrich (St. Louis, MO).  $^{13}\text{C}$  NMR spectra were recorded on a Varian Inova 500 (125 MHz) spectrometer and are reported in terms of chemical shift. All chemical shifts are reported in parts per million ( $\delta$ ) relative to DMSO-d<sub>6</sub> or TMS (0 ppm) in D<sub>2</sub>O. ESI LC-MS analyses were performed on Shimadzu LCMS2020 with a Synergi Hydro-RP 80, 4  $\mu\text{M}$  column (30x2mm). A binary gradient of acetonitrile (with 0.1% formic acid) in water (with 0.1% formic acid) was used at a flow rate of 0.6 mL min<sup>-1</sup>.

## Reaction of Thiourea with Different ROS

Various ROS (15 mM) were reacted with thiourea (10 mM) in D<sub>2</sub>O for 10 min before spectral measurement by  $^{13}\text{C}$ -NMR. The ROS were prepared as follows: Hydrogen peroxide (H<sub>2</sub>O<sub>2</sub>), tert-butyl hydroperoxide (TBHP), peroxyxynitrite (NaONOO) and hypochlorite (NaOCl) were diluted to a 30 mM stock solution in D<sub>2</sub>O from commercially available reagents before being delivered to an equal volume of 20 mM thiourea solution. Superoxide (KO<sub>2</sub>) was prepared similarly as described above in DMSO and reacted with thiourea to give a final concentration of 12 mM O<sub>2</sub><sup>•-</sup>. Hydroxyl radicals ( $\bullet\text{OH}$ ) were generated by Fenton reaction using 30 mM H<sub>2</sub>O<sub>2</sub> and 300 mM FeSO<sub>4</sub> prior to addition of equal volume of 20 mM thiourea. To determine the extent of thiourea oxidation by H<sub>2</sub>O<sub>2</sub>, 10  $\mu\text{M}$   $^{13}\text{C}$ -thiourea was reacted with different H<sub>2</sub>O<sub>2</sub> concentrations (2-27  $\mu\text{M}$ ) in D<sub>2</sub>O for 10 min, and the accumulation of oxidized product was monitored by  $^{13}\text{C}$ -NMR. The ratios of integrated peak intensity of the oxidized products ( $^{13}\text{C}$ -TUO<sub>2</sub>) to the total signal intensities ( $^{13}\text{C}$ -TU +  $^{13}\text{C}$ -TUO<sub>2</sub>) were plotted against H<sub>2</sub>O<sub>2</sub> concentration.

## Kinetic Measurement of Thiourea Oxidation with H<sub>2</sub>O<sub>2</sub>

The extinction coefficient for thiourea was calculated according to Beer-Lambert law by monitoring UV absorbance at 237 nm ( $A_{237}$ ) across different thiourea concentrations (12.5-200  $\mu\text{M}$ ). The initial rate of thiourea oxidation was measured at 237 nm (thiourea consumption) as a function of time with a LAMBDA 25 UV-vis spectrophotometer (Perkin-Elmer). Thiourea oxidation is initiated by the addition of freshly prepared H<sub>2</sub>O<sub>2</sub> (0.125-8 mM) into thiourea solution (0.0625 and 0.125 mM) in PBS, pH 7.4. Reactions were monitored as  $A_{237}$  change, and the initial rate of oxidation (mM/Min) was calculated for the first 500 s and plotted against H<sub>2</sub>O<sub>2</sub> concentration. The second order rate constant ( $k_2$ ) was calculated from the slope of the graph (Fig S2) and averaged across two different thiourea concentrations. All reaction mixtures had a minimal volume of 100  $\mu\text{L}$  and their readings were taken in a UVette cuvette (Eppendorf).

## Polarization Method and T<sub>1</sub> Measurement *in vitro*

A HyperSense DNP system (Oxford Instruments Molecular Biotoools, Oxford, UK) and a SPINlab polarizer (GE Healthcare, Waukesha, WI) were used for the hyperpolarization of [1- $^{13}\text{C}$ ]-thiourea. For the HyperSense, 4 M  $^{13}\text{C}$ -thiourea and 15 mM OX063 (Oxford

instruments) were polarized in 60% (v/v) glycerol by irradiating at 139.88 GHz at 1.2 K. The frozen sample was rapidly dissolved in 100 mM Trizma buffer at pH 7.6 (dissolution media) to give a 50 mM final thiourea concentration before transferring to a clinical 3T MR Scanner for spectral measurement. For *in vitro* detection of thiourea oxidation, hyperpolarized  $^{13}\text{C}$ -thiourea was rapidly dissolved in the dissolution media and mixed with  $\text{H}_2\text{O}_2$  (final concentration = 50  $\mu\text{M}$ ) for  $\sim 30$  s before spectral acquisition. For the SPINlab, 4 M  $^{13}\text{C}$ -thiourea and 15 mM AH111501 (GE Healthcare) were placed in the sample vial with 16 mL of dissolution media in the research fluid path (GE Healthcare) and polarized in 60% (v/v) glycerol by irradiating at 139.88 GHz at 0.8 K. Approximately 7 mL of final solution of 50 mM thiourea was collected and scanned using a clinical 3T MR Scanner. Liquid-state polarization and longitudinal relaxation time ( $T_1$ ) were estimated by comparing the hyperpolarized thiourea signal and the thermal polarization signal using an *in vitro* sample. A non-selective pulse-and-acquire sequence with a constant flip angle of  $5.625^\circ$ , 5-kHz spectral width and 2,048 points, and temporal resolution of 3 s for 4 min was used for the hyperpolarized sample. Resonance frequencies of TU and the oxidized products are assigned based on the resonance of a 1-M  $^{13}\text{C}$ -bicarbonate phantom measured prior to each hyperpolarized scan. The  $T_1$  was estimated after correcting the signal loss due to the radiofrequency (RF) excitations. After the hyperpolarized magnetization is fully relaxed, the thiourea solution was doped with gadolinium to shorten the  $T_1$  (30  $\mu\text{L}/\text{mL}$ ) and the thermal polarization was measured 400 times and averaged with  $90^\circ$  flip-angles and 10 s of repetition time. A  $^{13}\text{C}/^1\text{H}$  dual-tuned quadrature volume coil (diameter = 60 mm) was used for both RF transmit and data acquisitions.

### ***In Vivo* Detection of $^{13}\text{C}$ -Thiourea with Magnetic Resonance Spectroscopy Imaging**

The rats and mice were anesthetized with 1.5-3 % of isoflurane in oxygen (1.5 L/min) for tail vein catheterization and imaging experiments. Respiration, temperature, heart rate and oxygen saturation of the animals were monitored throughout the experiments. Body temperature was regulated at  $\sim 36\text{-}37^\circ\text{C}$  using a warm water blanket placed underneath the animals, and respiration was maintained at  $\sim 60$  breaths/min.  $^{13}\text{C}$ -thiourea was polarized using the SPINlab and rapidly dissolved as previously described. Hyperpolarized  $^{13}\text{C}$ -thiourea solution was injected into a rat through a tail vein catheter at a rate of approximately 0.25 mL/s for imaging experiments (total injection volume = 4 ml). For *in vivo* detection of thiourea oxidation, hyperpolarized  $^{13}\text{C}$ -thiourea was rapidly dissolved in dissolution media, mixed with  $\text{H}_2\text{O}_2$  (final concentration = 30  $\mu\text{M}$ ) and injected into the intraperitoneal cavity of a mouse at a rate of approximately 30  $\mu\text{L}/\text{s}$  (total injection volume = 1 ml). The time delay from dissolution to start of injection was  $\sim 20$  s. All animal procedures were approved by the local Institutional Animal Care and Use Committee.

Animal experiments were performed on a clinical 3T MR scanner (GE Healthcare, Waukesha, WI). Single-shot fast spin-echo MR images in the axial, sagittal and coronal planes with 2-mm slice thickness were acquired as anatomical references for prescribing the  $^{13}\text{C}$  MR spectroscopy experiments. For  $^{13}\text{C}$  MRSI studies in rats, the  $^{13}\text{C}/^1\text{H}$  dual-tuned quadrature transmit/receive RF volume coil was used. A single time-point  $^{13}\text{C}$  imaging was acquired using a free induction decay chemical shift imaging sequence over



an oblique slice that contains heart, liver, and kidney (field of view =  $80 \times 80 \text{ mm}^2$ , matrix size =  $16 \times 16$ , spectral width = 5 kHz, spectral point = 256, slice thickness = 1.5 cm, repetition time = 75 ms). For  $^{13}\text{C}$  MRS studies in mice, a custom-built  $^{13}\text{C}$  transmit/receive surface coil (diameter = 28 mm) was placed over the liver with mouse supine and a quadrature volume  $^1\text{H}$  coil (diameter = 70 mm) was used for anatomical localization and to confirm the position of the  $^{13}\text{C}$  coil with respect to the liver. A non-selective pulse-and-acquire sequence with flip-angles of  $10^\circ$ , 5-kHz spectral width and 2,048 points was used to acquire  $^{13}\text{C}$  spectra every 3 s for 4 min immediately after the  $^{13}\text{C}$ -thiourea injection.
